# Supplementary material for: Elucidating the influence of electrostatic force on the re-arrangement of H-bonds of protein polymers in the presence of salts
Source: Royal Society of Chemistry journal article supplement (doi:10.1039/d3sm01440a), 2024-01-01
Supplement: d3sm01440a1.pdf [file d3sm01440a1.pdf]

## Supporting Information

# Elucidating the influence of electrostatic force on the re-arrangement of H-bonds of protein polymer in the presence of salts

Tithi Basu,<sup>#</sup> Sougat Das,<sup>#</sup> Saptarshi Majumdar<sup>\*</sup>

Department of Chemical Engineering  
Indian Institute of Technology Hyderabad  
Telangana, 502285

India

<sup>#</sup>Authors contributed equally

<sup>\*</sup>Corresponding author

E-mail: [saptarshi@che.iith.ac.in](mailto:saptarshi@che.iith.ac.in)

### Section S1. OPLS-AA forcefield parameters

The OPLS-AA forcefield parameters are: force constants  $k$ , equilibrium bond  $r_o$  and equilibrium angle  $\theta_o$ , the Fourier coefficients  $V$ , the partial charges on each atom  $q$ , and the Lennard–Jones radii and well depths,  $\sigma$  and  $\epsilon$ . The geometric combining rules utilized for the Lennard–Jones coefficients are:  $\sigma_{ij} = (\sigma_{ii}\sigma_{jj})^{1/2}$  and  $\epsilon_{ij} = (\epsilon_{ii}\epsilon_{jj})^{1/2}$ .<sup>10</sup> To retain compatibility, all the parameters were used without any modifications.

$$E_{bonds} = \sum_i k_{b,i}(r_i - r_{o,i})^2 \quad (1)$$

$$E_{angles} = \sum_i k_{b,i}(\theta_i - \theta_{o,i})^2 \quad (2)$$

$$E_{torsion} = \sum_i \left[ \frac{1}{2}V_{1,i}(1 + \cos \varphi_i) + \frac{1}{2}V_{2,i}(1 + \cos 2\varphi_i) + \frac{1}{2}V_{3,i}(1 + \cos 3\varphi_i) + \frac{1}{2}V_{4,i}(1 + \cos 4\varphi_i) \right] \quad (3)$$

$$E_{nonbond} = \sum_i \sum_{j>i} \left\{ \frac{q_i q_j e^2}{r_{ij}} + 4\epsilon_{ij} \left[ \left( \frac{\sigma_{ij}}{r_{ij}} \right)^{12} - \left( \frac{\sigma_{ij}}{r_{ij}} \right)^6 \right] \right\} \quad (4)$$

All the other parameters like, partial charges on each atoms, sigma, epsilon, angle, dihedral, and improper coefficients were taken from the original OPLS-AA forcefield parameter files present in the Gromacs directory.

**Table T1:** Hydration radius of kosmotropes and chaotropes.

| Type of anions | Anions      | Hydration Radius: $R_H$ of anions (* $10^{-10}$ m) |
|----------------|-------------|----------------------------------------------------|
| Kosmotropes    | $SO_4^{2-}$ | 2.57                                               |
|                | $CH_3COO^-$ | 2.50                                               |
| Chaotropes     | $Cl^-$      | 1.58                                               |
|                | $NO_3^-$    | 1.43                                               |

**Table T2:** Values of  $R_g$  at pH 7 from MD simulations. The  $R_g$  for kosmotropes is slightly lower than the chaotropes due to the higher hydration radius of kosmotropes.

| Pure Gelatin | Salt Conc (%) | $Na_2SO_4$ | $CH_3COONa$ | $NaCl$ | $NaNO_3$ |
|--------------|---------------|------------|-------------|--------|----------|
| 1.79         | 0.25          | 1.78       | 1.79        | 1.80   | 1.81     |
|              | 1             | 1.77       | 1.78        | 1.81   | 1.82     |
|              | 2             | 1.8        | 1.81        | 1.89   | 1.84     |

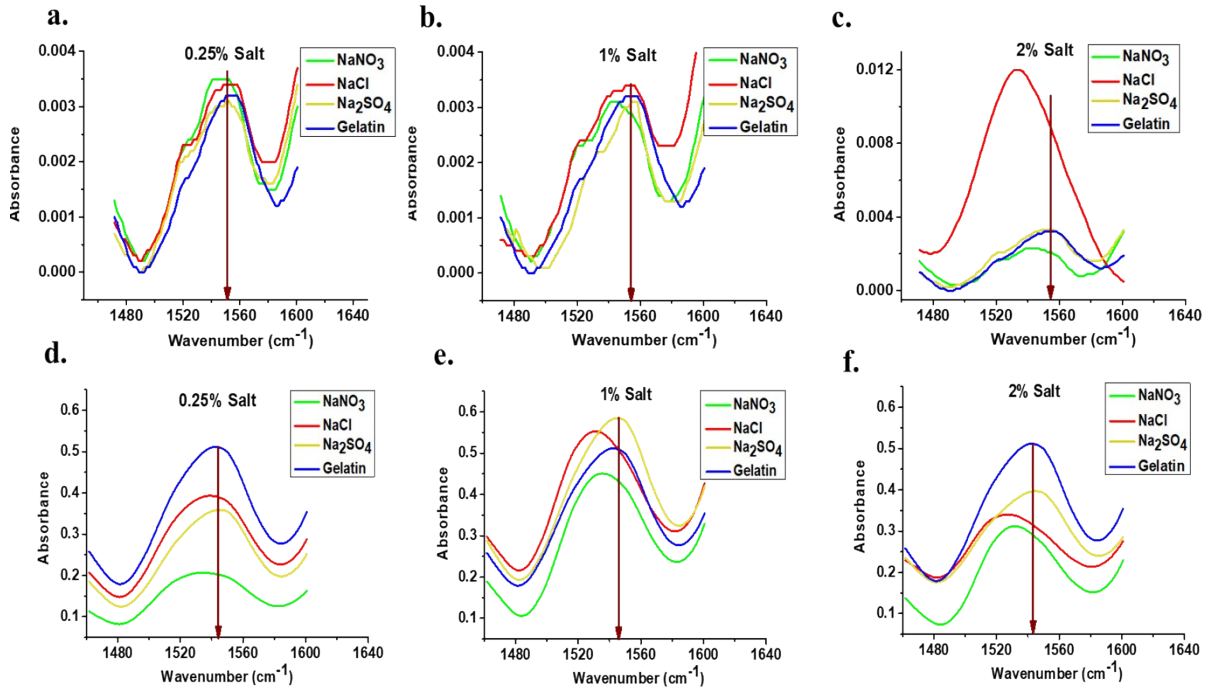

**Fig S1:** ATR/FTIR amide II bands of gelatin Type A with kosmotropes and chaotropes for (a) 0.25% salt concentration, (b) 1% salt concentration, and (c) 2% salt concentration. ATR/FTIR amide II bands of gelatin Type B with kosmotropes and chaotropes for (d) 0.25% salt concentration, (e) 1% salt concentration, and (f) 2% salt concentration. The chaotropes show a shift in the amide II band at 1% and 2% salt concentration as they are able to interact with gelatin.

**Table T3:** Values of  $R_g$  at pH 3 from MD simulations.

| Pure Gelatin | Salt Conc (%) | Na <sub>2</sub> SO <sub>4</sub> | CH <sub>3</sub> COONa | NaCl | NaNO <sub>3</sub> |
|--------------|---------------|---------------------------------|-----------------------|------|-------------------|
| 2.26         | 0.25          | 2.19                            | 2.17                  | 2.12 | 2.13              |
|              | 1             | 2.07                            | 2.03                  | 1.98 | 1.97              |
|              | 2             | 1.98                            | 1.97                  | 1.9  | 1.92              |

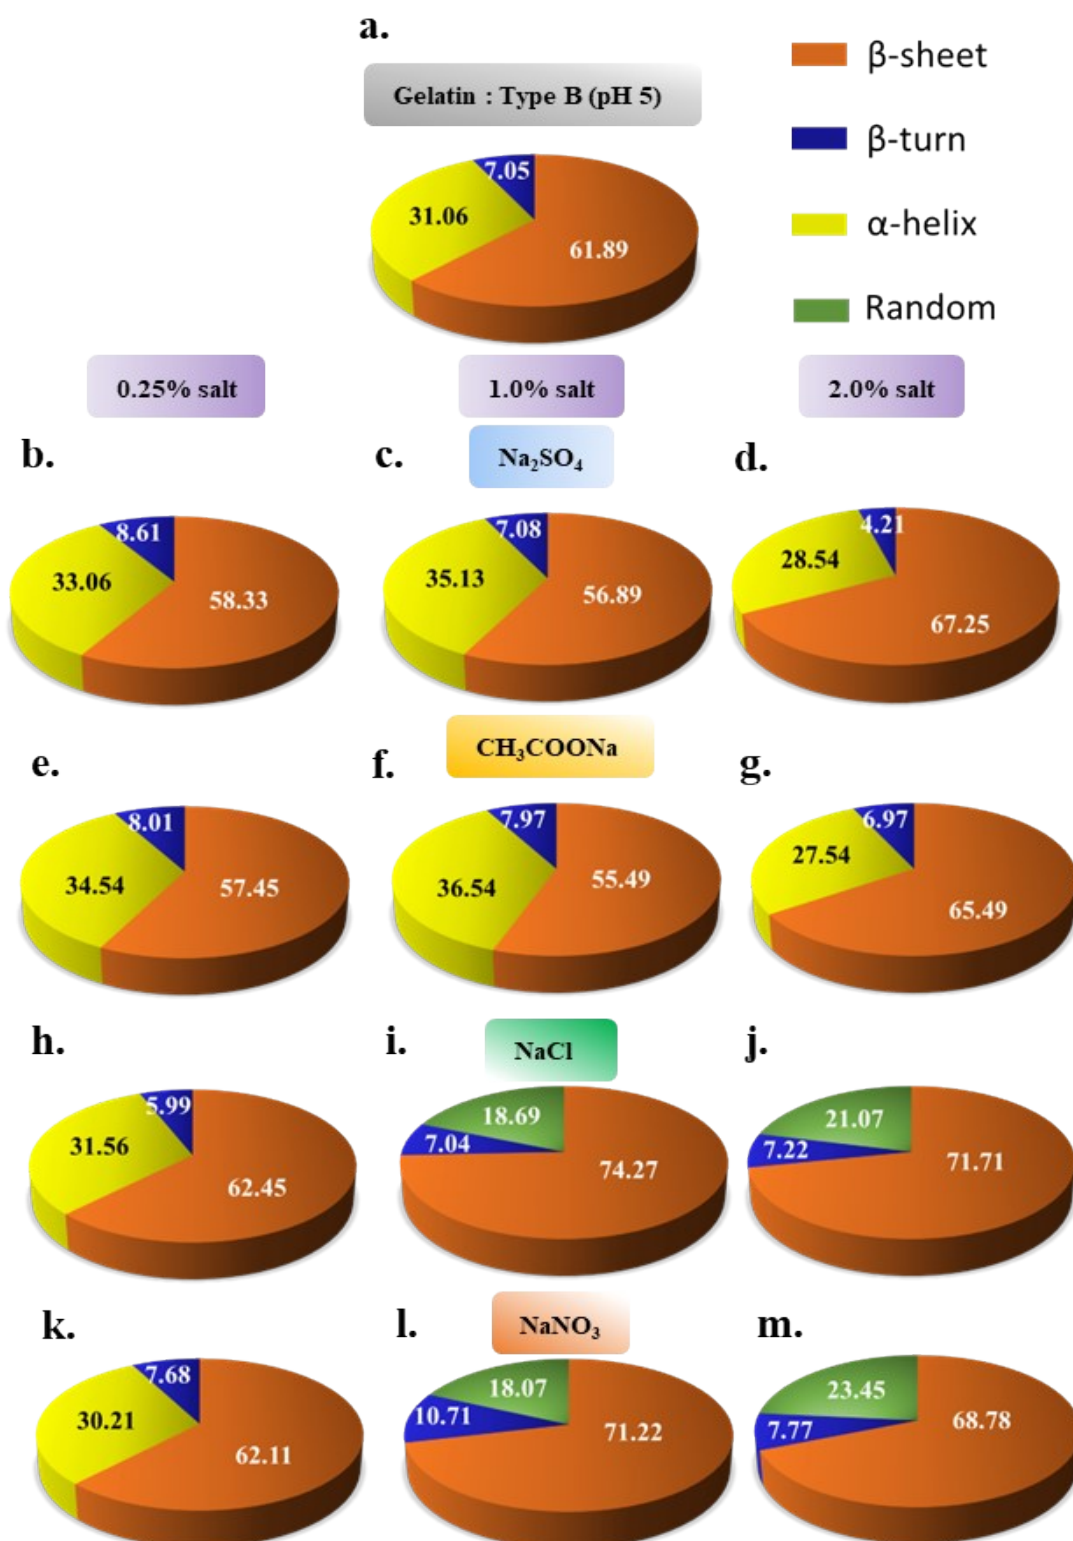

**Fig. S2:** Secondary structures of Gelatin (Type B) with different salts: 0.25%, 1%, and 2% salt concentrations at pH 5 (IEP). Not much change was observed for 0.25% salt. Kosmotropes:  $\alpha$ -helix increases at 1% salt due to the collapse of chains and breaks at 2% salt due to screening of electrostatic attractions. Chaotropes:  $\alpha$ -helix breaks into random structures.

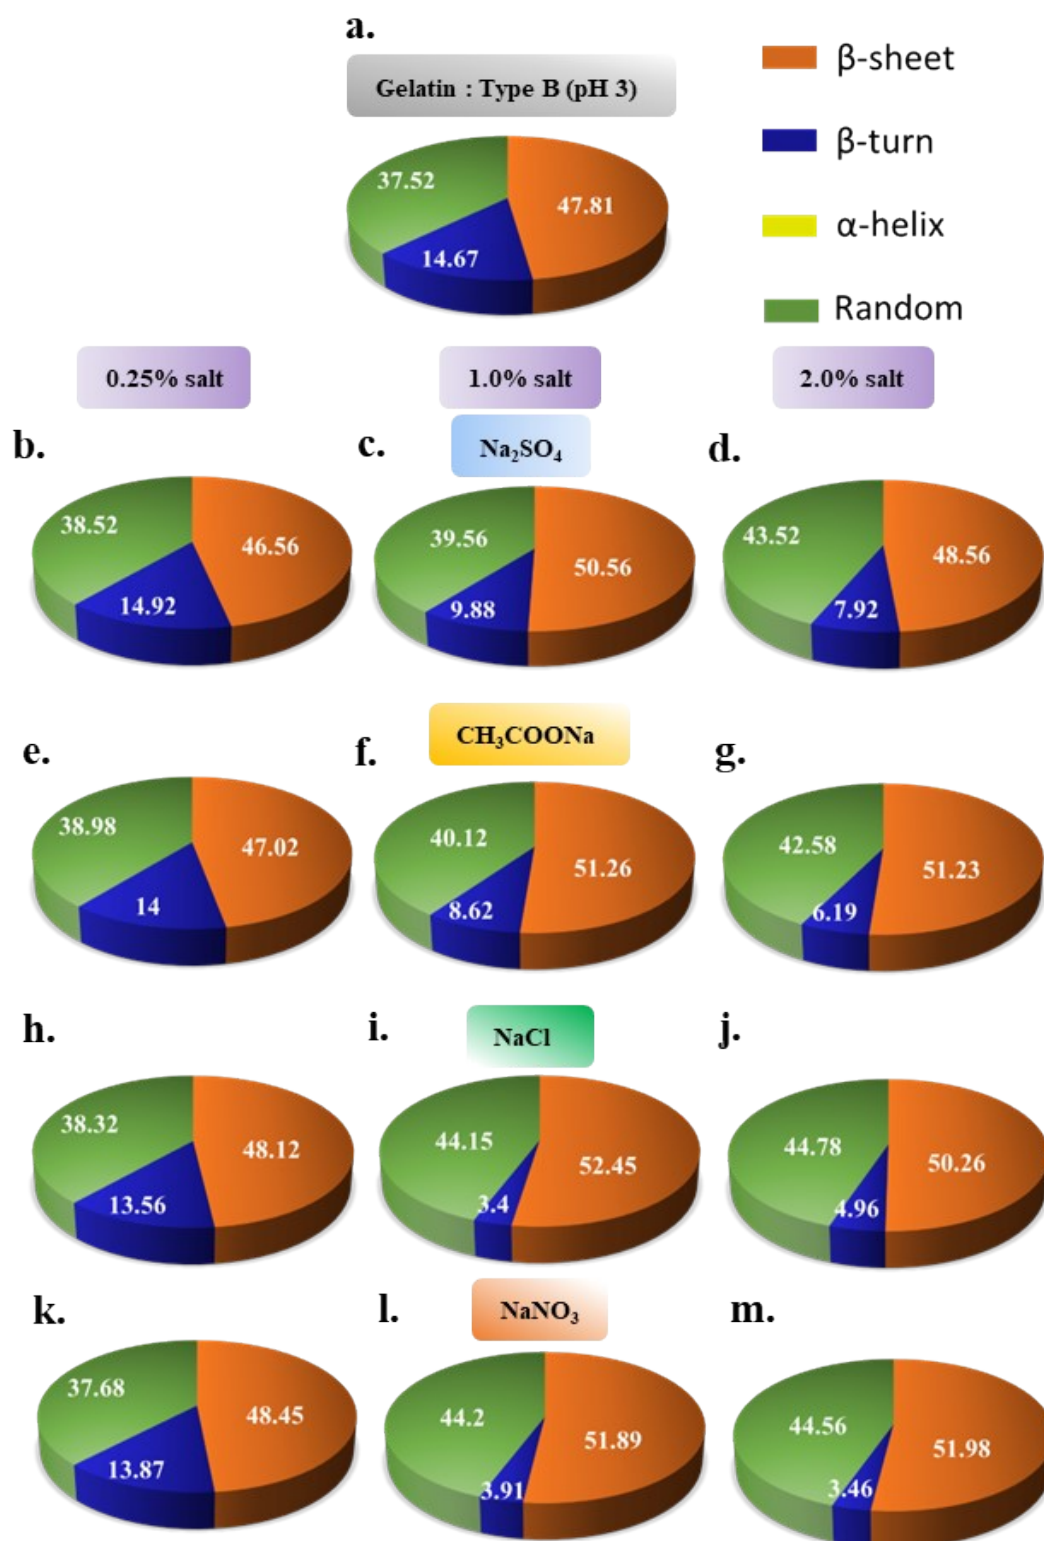

**Fig. S3:** Secondary structures of Gelatin (Type B) with different salts: 0.25%, 1%, and 2% salt concentrations at pH 3. At 1% and 2% salt β-sheets and random structure increases. Chaotropes interact more thus the chains are collapsed, which increases β-sheets compared to kosmotropes.

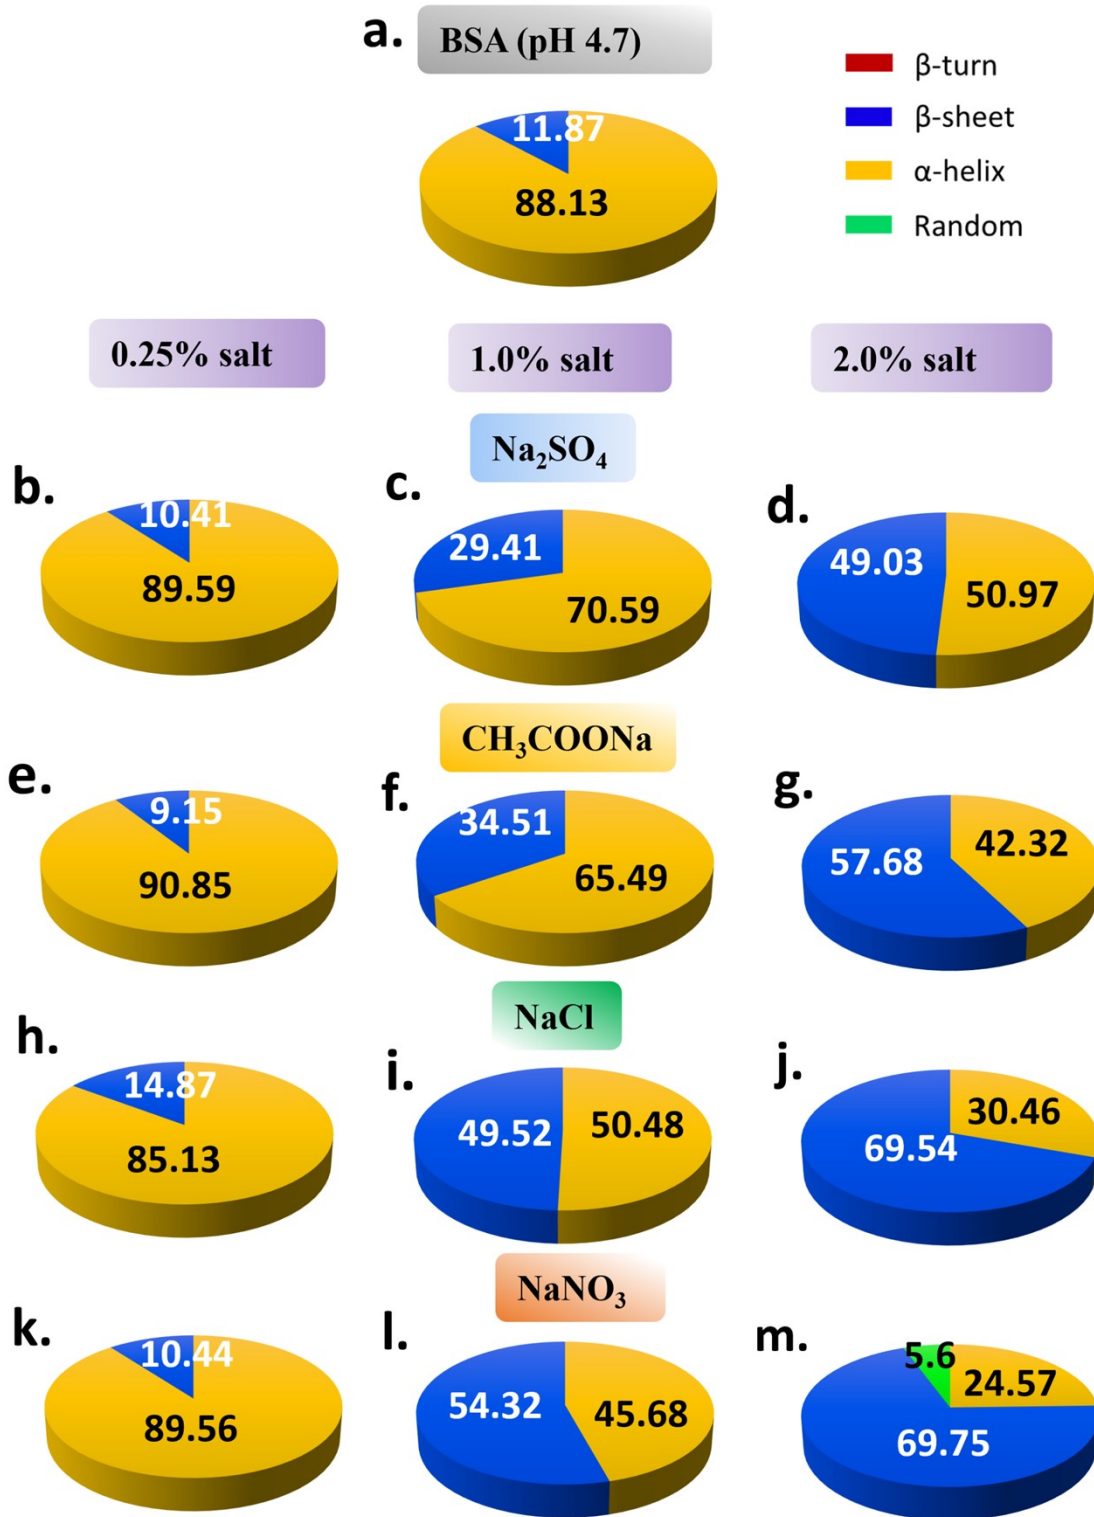

**Fig. S4:** Secondary structures of Bovine Serum Albumin (BSA) with different salts: 0.25%, 1%, and 2% salt concentrations at pH 4.7 (IEP). At 1% and 2% salt  $\alpha$ -helix breaks to form  $\beta$ -sheets. Chaotropes interact more thus increasing  $\beta$ -sheets compared to kosmotropes.

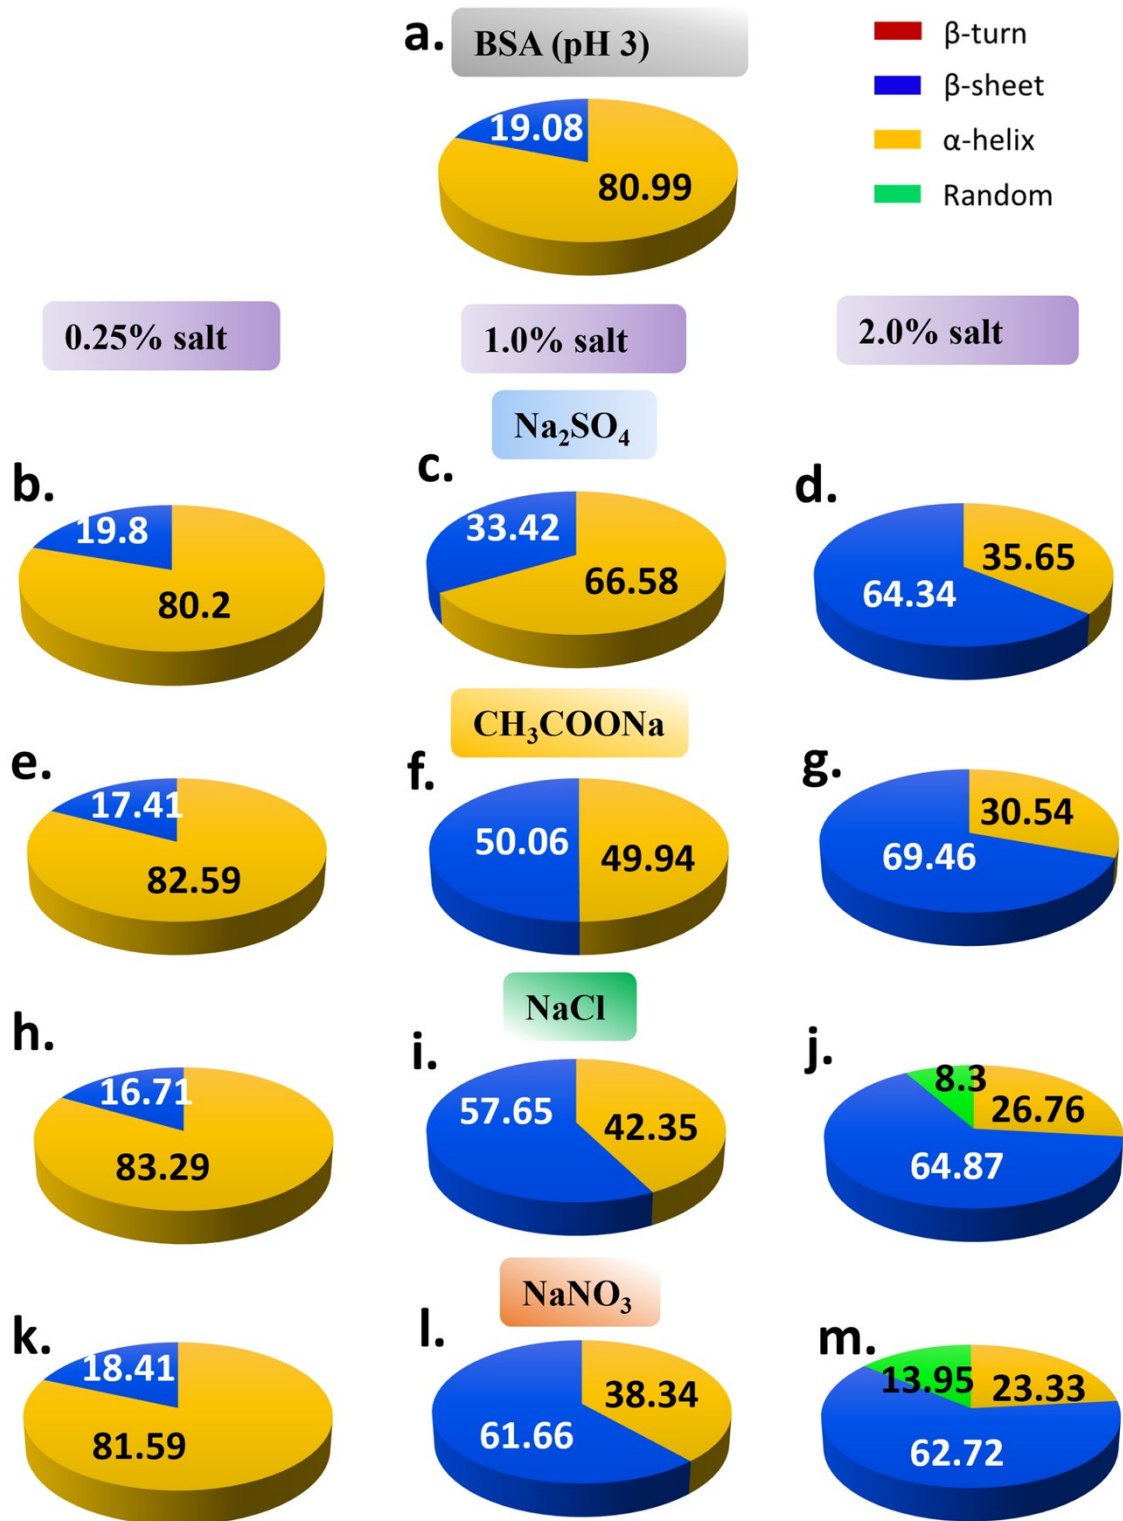

**Fig. S5:** Secondary structures of Bovine Serum Albumin (BSA) with different salts: 0.25%, 1%, and 2% salt concentrations at pH 3. Not much change was observed for 0.25% salt. Kosmotropes:  $\alpha$ -helix breaks to form  $\beta$ -sheets. Chaotropes:  $\alpha$ -helix breaks into random structures.

**Table T4:** Variation in gelatin secondary structure with time (Gelatin Type A with 2% NaCl).

| Sample                 | $\beta$ - sheet (%) | Random (%) | $\alpha$ - helix (%) | $\beta$ - turn (%) |
|------------------------|---------------------|------------|----------------------|--------------------|
| Gelatin                | 59.46               | 12.28      | 19.38                | 8.88               |
| Gelatin & salt @1 min  | 66.61               | 28.33      | -                    | 5.05               |
| Gelatin & salt @6 min  | -                   | 86.123     | -                    | 13.87              |
| Gelatin & salt @11 min | 8.14                | 75.45      | -                    | 16.40              |
| Gelatin & salt @16 min | 66.34               | 23.97      | -                    | 9.69               |
| Gelatin & salt @21 min | 68.31               | 24.01      | -                    | 7.68               |
| Gelatin & salt @26 min | 66.47               | 25.63      | -                    | 7.9                |
